# Supplementary figures and images for: Thermal spin filtering, thermal spin switching and negative-differential-resistance in thermal spin currents in zigzag SiC nanoribbons
Source: Royal Society of Chemistry journal article supplement (doi:10.1039/c4cp01886a), 2014-01-01

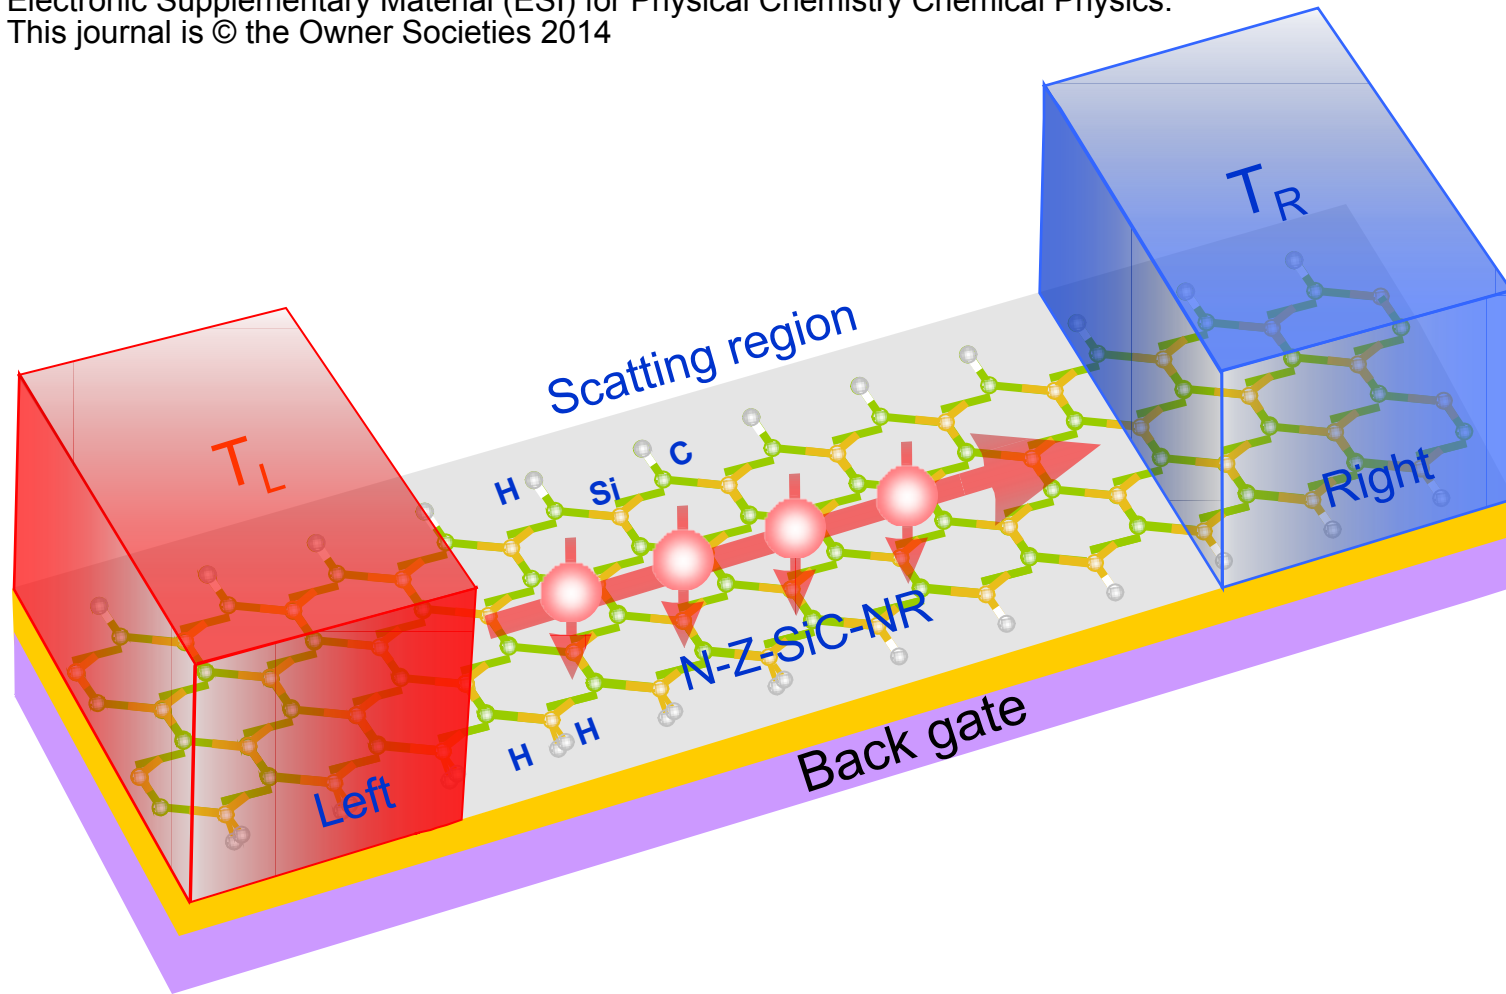

Supplement: c4cp01886a1.pdf [file c4cp01886a1.pdf]
